# Supplementary material for: The spread of chloramphenicol-resistant Neisseria meningitidis in Southeast Asia
Source: PubMed Central journal article supplement (PMC7294222; doi:10.1016/j.ijid.2020.03.081), 2020-06
Supplement: mmc1.pdf [file mmc1.pdf]

a)

```

NM01      TGTATGTTTATTAAATTCTAAATCAATAATAATATTTCCCAATCAGAGCTT
NM11      TGTATGTTTATTAAATTCTAAATCAATAATAATATTTCCCAATCAGAGCTT
NM12      TGTATGTTTATTAAATTCTAAATCAATAATAATATTTCCCAATCAGAGCTT
NM13      TGTATGTTTATTAAATTCTAAATCAATAATAATATTTCCCAATCAGAGCTT
NM16      TGTATGTTTATTAAATTCTAAATCAATAATAATATTTCCCAATCAGAGCTT
NM18      TGTATGTTTATTAAATTCTAAATCAATAATAATATTTCCCAATCAGAGCTT
NM20      TGTATGTTTATTAAATTCTAAATCAATAATAATATTTCCCAATCAGAGCTT
NM25      TGTATGTTTATTAAATTCTAAATCAATAATAATATTTCCCAATCAGAGCTT
DuyDNT    TGTATGTTTATTAAATTCTAAATCAATAATAATATTTCCCAATCAGAGCTT
MC58      TGTATGTTTATTAAATTCTAAATCAATAATAATATTTCCCA-----

```

b)

```

NM01      GTTAGTACAAAGACCTTGTGTTTCTTTTTAACCAATATTTTCATATATATC
NM11      GTTAGTACAAAGACCTTGTGTTTCTTTTTAACCAATATTTTCATATATATC
NM12      GTTAGTACAAAGACCTTGTGTTTCTTTTTAACCAATATTTTCATATATATC
NM13      GTTAGTACAAAGACCTTGTGTTTCTTTTTAACCAATATTTTCATATATATC
NM16      GTTAGTACAAAGACCTTGTGTTTCTTTTTAACCAATATTTTCATATATATC
NM18      GTTAGTACAAAGACCTTGTGTTTCTTTTTAACCAATATTTTCATATATATC
NM20      GTTAGTACAAAGACCTTGTGTTTCTTTTTAACCAATATTTTCATATATATC
NM25      GTTAGTACAAAGACCTTGTGTTTCTTTTTAACCAATATTTTCATATATATC
DuyDNT    GTTAGTACAAAGACCTTGTGTTTCTTTTTAACCAATATTTTCATATATATC
MC58      -----TTAACCAATATTTTCATATATATC

```

Supplementary Figure 1. A sequence alignment of the nine chloramphenicol resistant and intermediate strains and the MC58 reference genome, showing the a) upstream and b) downstream flanking regions of the *catP* insertion which match the previously-reported insertion.
